# Supplementary material
Source: HighWire-hosted journal article supplement (http://www.jneurosci.org/highwire/filestream/597172/field_highwire_adjunct_files/0/45791_2_supp_0_l83x3s.pdf)
Supplement: 45791_2_supp_0_l83x3s.pdf [file 45791_2_supp_0_l83x3s.pdf]

Figure S1

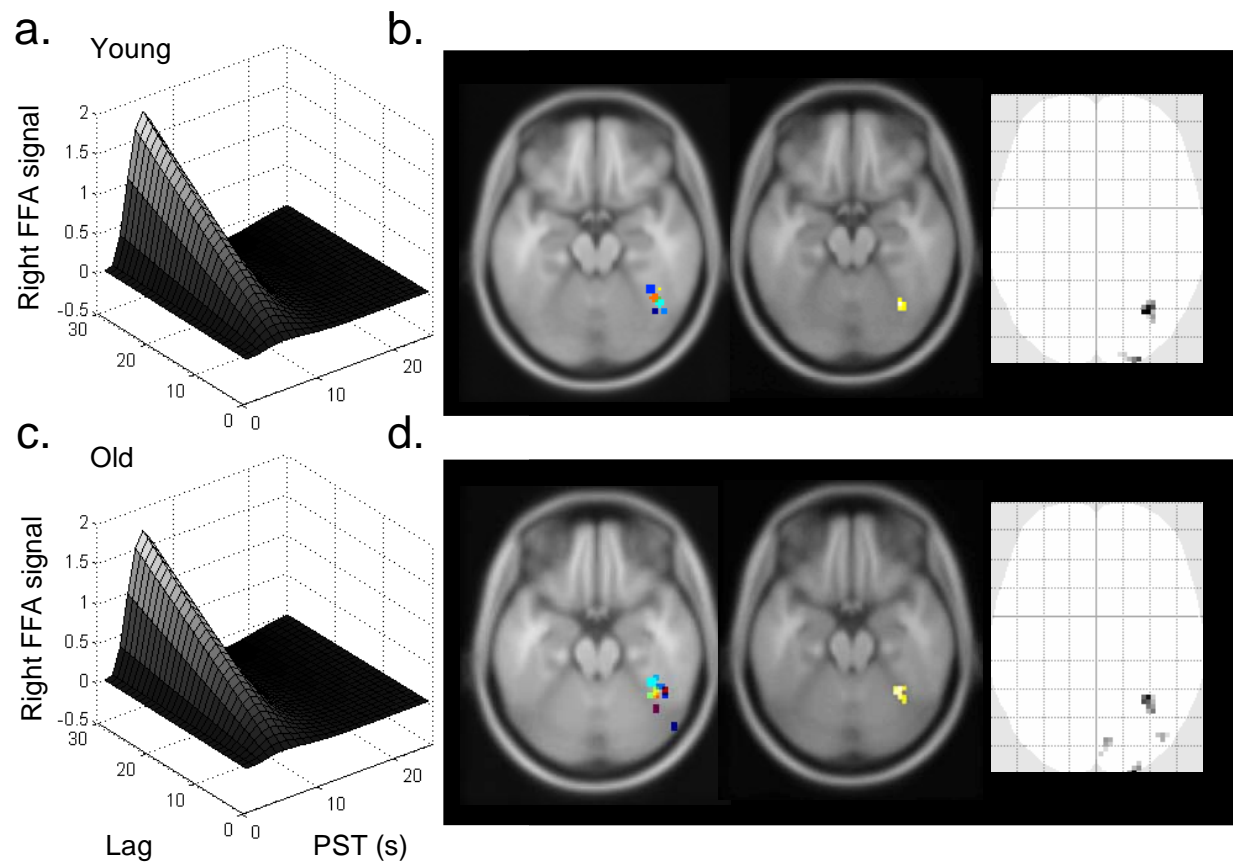

Figure S1. Repetition lag analysis. In both young [S1a.] and older adults [S1c.], the magnitude of FFA adaptation to repeated faces—repetition suppression—decreased with increasing lag between repetitions. An FFA mask was constructed from the random effects [face > place] contrast of each group's separate face/place localizer analysis and used for small volume FDR correction (Genovese et al., 2002),  $p < 0.05$ . Plots: Mean best fitting canonical event-related response to face exposures 2-5 in the right FFA, as a function of repetition lag ( $y$ -axis) and peristimulus time ( $x$ -axis); 24 second window displayed. In young [S1b.] and older adults [S1d.], left panels show locations of individual FFAs from the separate face/place localizer, for each age group, superimposed in different colors on a template brain in Montreal Neurological Institute (MNI) space. Middle panels: Significant effects of lag were detected in the FFA, for each age group, shown within the FFA mask. Clusters in the middle panels are displayed at the same axial slice as the left panels (Young:  $z = -18$ ; Old  $z = -21$ ). Right panels: Maximum intensity projections (axial viewpoint) of the same lag effects in the middle panel at the same threshold, but without a [Face > Place] mask, demonstrate the selectivity of the BOLD response to face repetition lag. Clusters exhibiting lag sensitivity were detected only within the right FFA and a few distributed clusters within primary visual cortex.

Table S1

## Parahippocampal place area (PPA) Regions of Interest (ROIs)

| Young PPA                 |          |          |          | Old PPA              |          |          |          |
|---------------------------|----------|----------|----------|----------------------|----------|----------|----------|
| ID                        | <i>x</i> | <i>y</i> | <i>z</i> | ID                   | <i>x</i> | <i>y</i> | <i>z</i> |
| y01                       | 30       | -45      | -6       | o01                  | 24       | -48      | -15      |
| y02                       | 27       | -51      | -12      | o02                  | 24       | -42      | -18      |
| y03                       | 27       | -48      | -9       | o03                  | 27       | -63      | -15      |
| y04                       | 27       | -51      | -9       | o04                  | 27       | -39      | -12      |
| y05                       | 33       | -45      | -9       | o05                  | 27       | -48      | -18      |
| y06                       | 30       | -48      | -6       | o06                  | 24       | -57      | -12      |
| y07                       | 27       | -57      | -12      | o07                  | 24       | -42      | -12      |
| y08                       | 30       | -48      | -9       | o08                  | 27       | -60      | -6       |
| y09                       | 30       | -57      | -15      | o09                  | 30       | -48      | -12      |
| y10                       | 30       | -63      | -18      | o10                  | 21       | -39      | -12      |
| y11                       | 27       | -45      | -9       | o11                  | 27       | -54      | -9       |
| y12                       | 24       | -39      | -18      | o12                  | 30       | -45      | -9       |
| y13                       | 24       | -45      | -9       | o13                  | 24       | -39      | -15      |
| y14                       | 24       | -45      | -15      | o14                  | 24       | -51      | -9       |
| Young PPA (experiment 1b) |          |          |          |                      |          |          |          |
| yc01                      | 30       | -51      | -12      |                      |          |          |          |
| yc02                      | 30       | -51      | -6       |                      |          |          |          |
| yc03                      | 27       | -60      | -9       |                      |          |          |          |
| yc04                      | 24       | -39      | -18      |                      |          |          |          |
| yc05                      | 27       | -39      | -12      |                      |          |          |          |
| yc06                      | 30       | -51      | -6       |                      |          |          |          |
| Average MNI: Young PPA    |          |          |          | Average MNI: Old PPA |          |          |          |
|                           | 28       | -49      | -11      |                      | 26       | -48      | -12      |

MNI = Montreal Neurological Institute brain atlas space

Table S2

## Fusiform Face Area (FFA) Regions of Interest (ROIs)

| <b>Young FFA</b>                 |          |          |          | <b>Old FFA</b>              |          |          |          |
|----------------------------------|----------|----------|----------|-----------------------------|----------|----------|----------|
| <b>ID</b>                        | <b>x</b> | <b>y</b> | <b>z</b> | <b>ID</b>                   | <b>x</b> | <b>y</b> | <b>z</b> |
| y01                              | 39       | -63      | -18      | o01                         | 51       | -72      | -18      |
| y02                              | 39       | -39      | -21      | o02                         | 39       | -60      | -21      |
| y03                              | 36       | -48      | -18      | o03                         | 42       | -45      | -18      |
| y04                              | 45       | -63      | -18      | o04                         | 39       | -39      | -21      |
| y05                              | 39       | -66      | -12      | o05                         | 36       | -42      | -21      |
| y06                              | 42       | -57      | -18      | o06                         | 39       | -36      | -27      |
| y07                              | 42       | -72      | -24      | o07                         | 36       | -51      | -18      |
| y08                              | 45       | -54      | -24      | o08                         | 39       | -48      | -18      |
| y09                              | 42       | -48      | -21      | o09                         | 42       | -63      | -15      |
| y10                              | 36       | -42      | -24      | o10                         | 39       | -57      | -12      |
| y11                              | 39       | -54      | -18      | o11                         | 39       | -51      | -21      |
| y12                              | 42       | -54      | -12      | o12                         | 39       | -60      | -18      |
| y13                              | 39       | -42      | -24      | o13                         | 45       | -48      | -18      |
| y14                              | 42       | -51      | -24      | o14                         | 39       | -57      | -15      |
| <b>Young FFA (experiment 1b)</b> |          |          |          |                             |          |          |          |
| yc01                             | 45       | -63      | -18      |                             |          |          |          |
| yc02                             | 45       | -45      | -21      |                             |          |          |          |
| yc03                             | 36       | -75      | -12      |                             |          |          |          |
| yc04                             | 39       | -60      | -15      |                             |          |          |          |
| yc05                             | 39       | -63      | -12      |                             |          |          |          |
| yc06                             | 39       | -54      | -12      |                             |          |          |          |
| <b>Average MNI: Young FFA</b>    |          |          |          | <b>Average MNI: Old FFA</b> |          |          |          |
|                                  | 41       | -56      | -18      |                             | 39       | -51      | -19      |

MNI = Montreal Neurological Institute brain atlas space

Table S3

## Whole brain analysis: Group X Repetition interaction

| <i>F</i> -contrast<br>Region               | MNI coordinates |          |          | <i>t</i> -contrast ( $z_{\min}=2.57$ ;<br>$p<0.005$ ; $k=10$ ) |         |
|--------------------------------------------|-----------------|----------|----------|----------------------------------------------------------------|---------|
|                                            | <i>X</i>        | <i>Y</i> | <i>Z</i> | O > Y                                                          | O < Y   |
| r. parahippocampal gyrus                   | 30              | -54      | -3       | 0.00005                                                        | -       |
| l. middle temporal pole                    | -48             | 12       | -24      | 0.00008                                                        | -       |
| r. inferior temporal gyrus                 | 54              | -60      | -15      | 0.0001                                                         | -       |
|                                            | 48              | -12      | -24      | 0.0001                                                         | -       |
| l. inferior frontal junction               | -39             | 36       | 39       | 0.0003*                                                        | -       |
| l. superior temporal pole                  | -54             | 12       | -9       | 0.0005                                                         | -       |
| r. inferior frontal gyrus (pars orbitalis) | 36              | 24       | -12      | -                                                              | 0.00002 |
| l. inferior frontal gyrus (pars orbitalis) | -48             | 27       | -3       | -                                                              | 0.0004  |
| cerebellar vermis                          | -3              | -57      | -12      | -                                                              | 0.0005  |
| l. precentral sulcus                       | -30             | 9        | 45       | -                                                              | 0.0006  |

*F*-contrast: brain areas exhibiting a group X repetition interaction ( $p < 0.005$ , voxel extent > 10); *t*-contrast: O > Y = greater adaptation (repetition suppression) in old compared to young adults (uncorrected  $p$ -values for peak voxel); \* areas surviving a cluster-level FDR corrected  $p < 0.05$ .
